# Supplementary material for: RECIL Versus Lugano for Treatment Response Assessment in FDG-Avid Non-Hodgkin Lymphomas: A Head-to-Head Comparison in 54 Patients
Source: PubMed Central journal article supplement (PMC7016710; doi:10.3390/cancers12010009), 2019-12-18
Supplement: cancers-12-00009-s001.pdf [file cancers-12-00009-s001.pdf]

**Table S1.** Treatment response: Lugano versus RECIL in 54 patients.

| <b>Interim restaging:</b> |       | <b>RECIL</b> |    |     |    |    |       |
|---------------------------|-------|--------------|----|-----|----|----|-------|
|                           |       | CR           | PR | MiR | SD | PD | Total |
| <b>Lugano</b>             | CR    | 32           | 0  | 6   | 0  | 0  | 38    |
|                           | PR    | 0            | 3  | 2   | 0  | 0  | 5     |
|                           | SD    | 0            | 0  | 0   | 2  | 0  | 3     |
|                           | PD    | 0            | 0  | 0   | 3  | 5  | 8     |
|                           | Total | 32           | 3  | 8   | 6  | 5  | 54    |
| <b>End of treatment:</b>  |       | <b>RECIL</b> |    |     |    |    |       |
|                           |       | CR           | PR | MiR | SD | PD | Total |
| <b>Lugano</b>             | CR    | 39           | 0  | 1   | 0  | 0  | 40    |
|                           | PR    | 0            | 1  | 1   | 0  | 0  | 2     |
|                           | SD    | 0            | 0  | 1   | 2  | 0  | 3     |
|                           | PD    | 0            | 0  | 0   | 3  | 6  | 9     |
|                           | Total | 39           | 1  | 3   | 5  | 6  | 54    |

CR, complete remission; PR, partial remission; MiR, minor response; SD, stable disease; PD, progressive disease

**Table S2.** Relationship between RECIL-based interim response and Lugano-based EOT response.

|                   |       | <b>RECIL interim</b> |    |     |    |    |       |
|-------------------|-------|----------------------|----|-----|----|----|-------|
|                   |       | CR                   | PR | MiR | SD | PD | Total |
| <b>Lugano EOT</b> | CR    | 32                   | 2  | 5   | 0  | 1  | 40    |
|                   | PR    | 0                    | 0  | 2   | 0  | 0  | 2     |
|                   | SD    | 0                    | 0  | 0   | 3  | 0  | 3     |
|                   | PD    | 0                    | 1  | 1   | 3  | 4  | 9     |
|                   | Total | 32                   | 3  | 8   | 6  | 5  | 54    |

CR, complete remission; PR, partial remission; MiR, minor response; SD, stable disease; PD, progressive disease

**Table S3.** Lugano versus RECIL in 41 DLBCL patients.

| <b>Interim restaging:</b> |       | <b>RECIL</b> |    |     |    |    |       |
|---------------------------|-------|--------------|----|-----|----|----|-------|
|                           |       | CR           | PR | MiR | SD | PD | Total |
| <b>Lugano</b>             | CR    | 23           | 0  | 5   | 0  | 0  | 28    |
|                           | PR    | 0            | 3  | 1   | 0  | 0  | 4     |
|                           | SD    | 0            | 0  | 0   | 2  | 0  | 2     |
|                           | PD    | 0            | 0  | 0   | 2  | 5  | 7     |
|                           | Total | 23           | 3  | 6   | 4  | 5  | 41    |
| <b>End of treatment:</b>  |       | <b>RECIL</b> |    |     |    |    |       |
|                           |       | CR           | PR | MiR | SD | PD | Total |
| <b>Lugano</b>             | CR    | 29           | 0  | 1   | 0  | 0  | 30    |
|                           | PR    | 0            | 1  | 0   | 0  | 0  | 1     |
|                           | SD    | 0            | 0  | 1   | 2  | 0  | 3     |
|                           | PD    | 0            | 0  | 0   | 1  | 6  | 7     |
|                           | Total | 29           | 1  | 2   | 3  | 6  | 41    |

CR, complete remission; PR, partial remission; MiR, minor response; SD, stable disease; PD, progressive disease
